# Supplementary material for: Changes in the asymmetric distribution of cholesterol in the plasma membrane influence streptolysin O pore formation
Source: PubMed Central journal article supplement (PMC6418215; doi:10.1038/s41598-019-39973-x), 2019-03-14

**Supplementary Information** for “Changes in the asymmetric distribution of cholesterol in the plasma membrane influence streptolysin O pore formation” by Fumihiko Ogasawara, Fumi Kano, Masayuki Murata, Yasuhisa Kimura, Noriyuki Kioka, and Kazumitsu Ueda

**Supplementary Fig. 1.** Original images of Fig. 4A.

**Supplementary Fig. 2.** Original images of Fig. 5A.

**Supplementary Fig. 3.** Original images of Fig. 6A, B.

**Supplementary Fig. 4.** The membrane used in Fig. 2A.

# Supplementary Figure 1

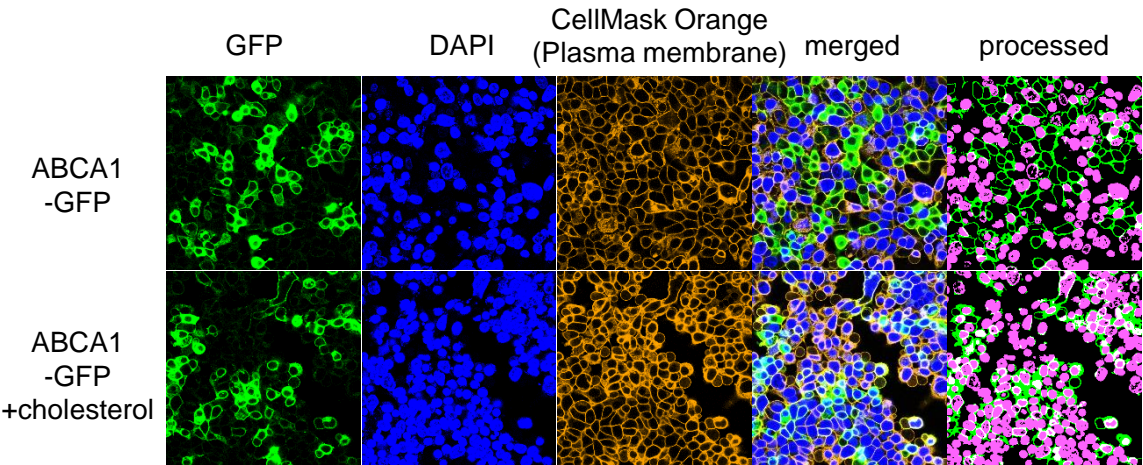

# Supplementary Figure 2

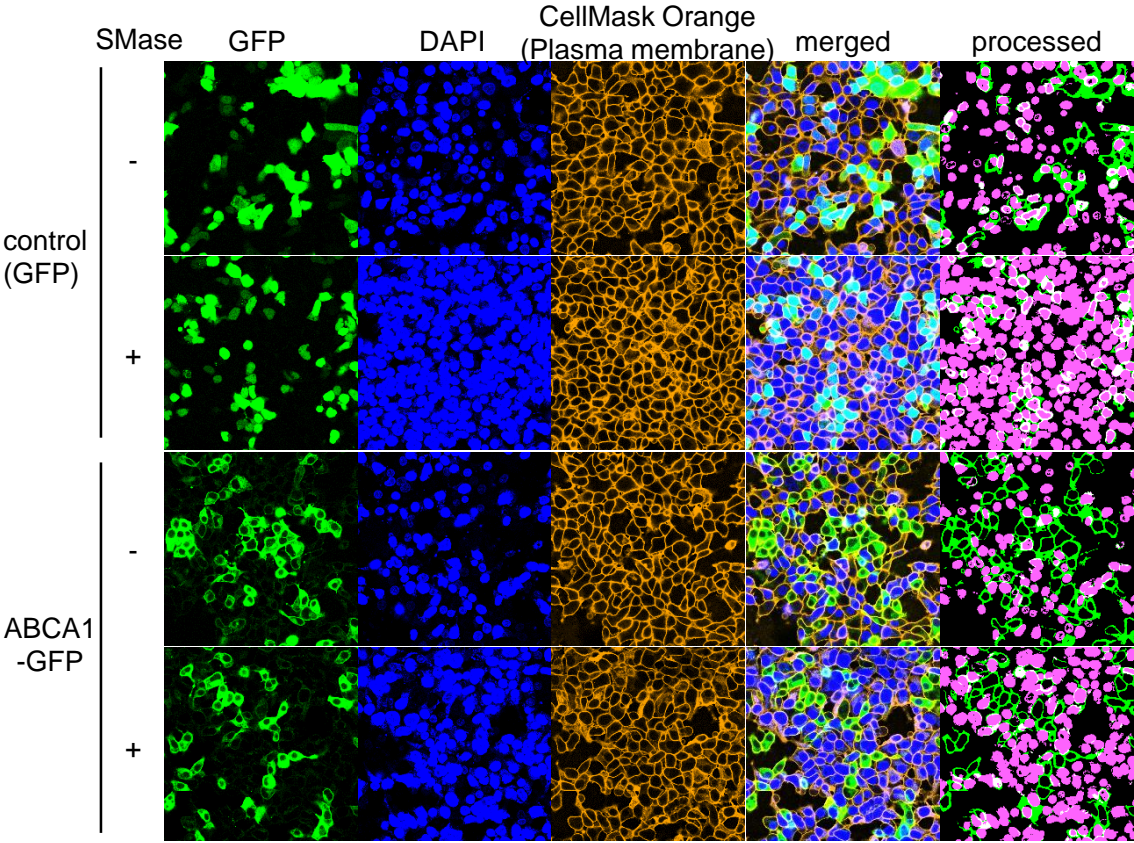

# Supplementary Figure 3

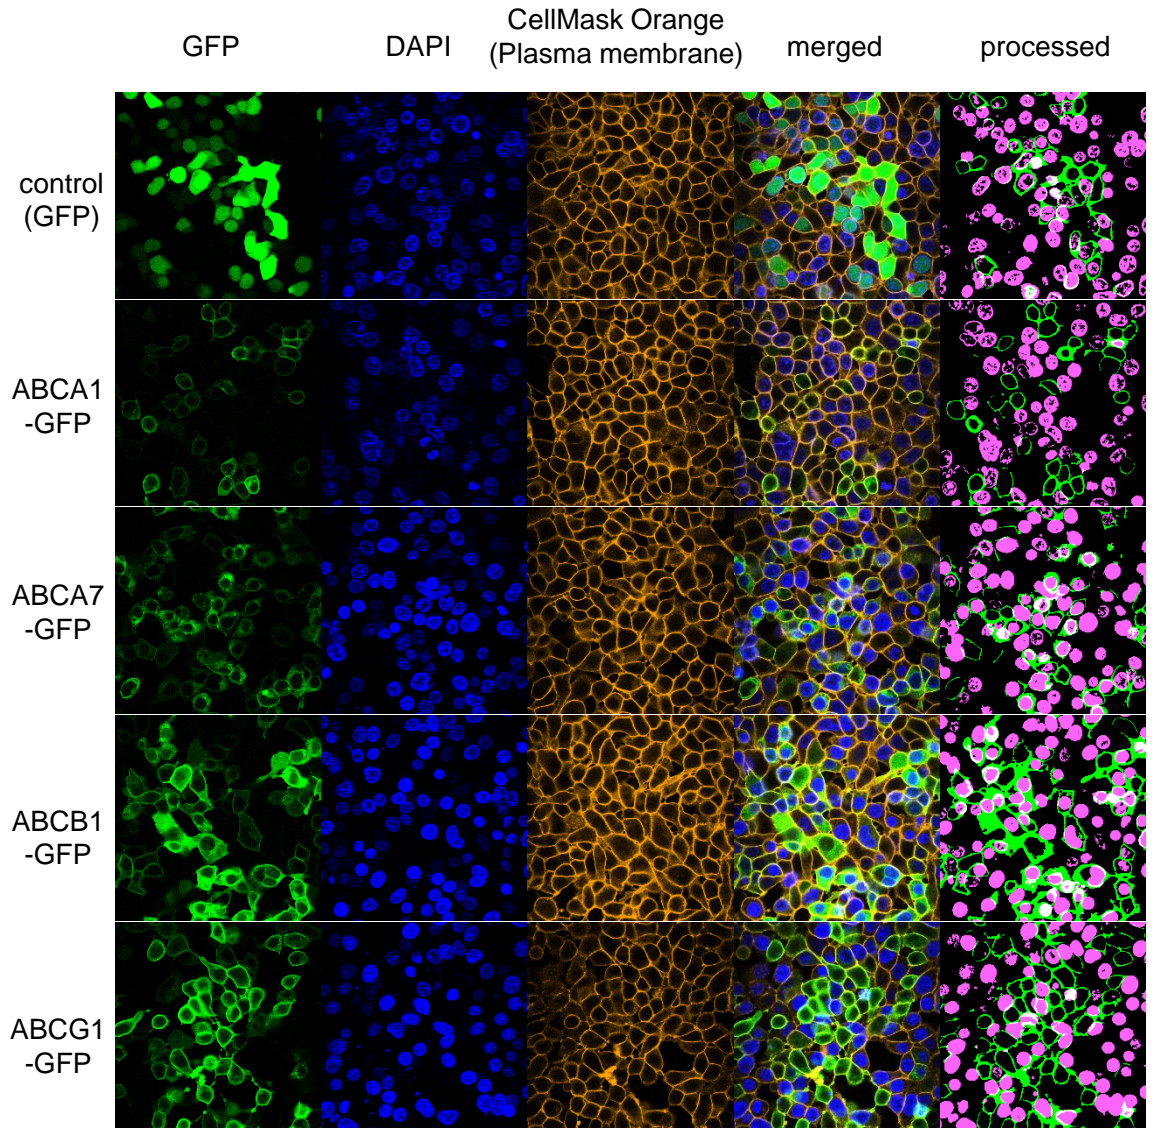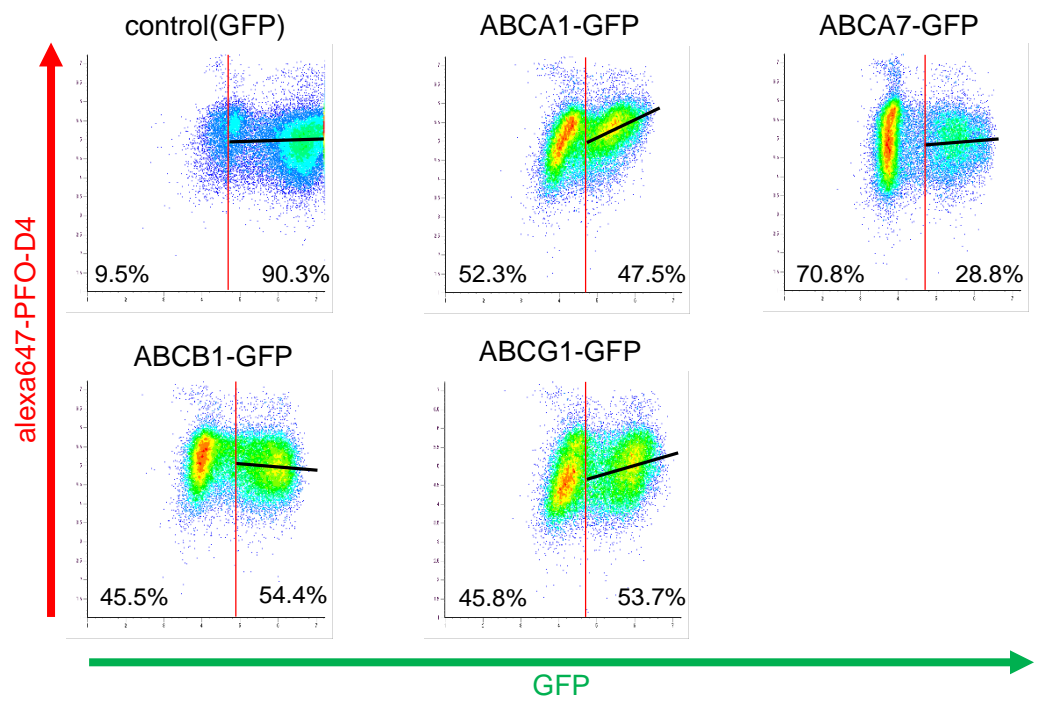

# Supplementary Figure 4

SLO

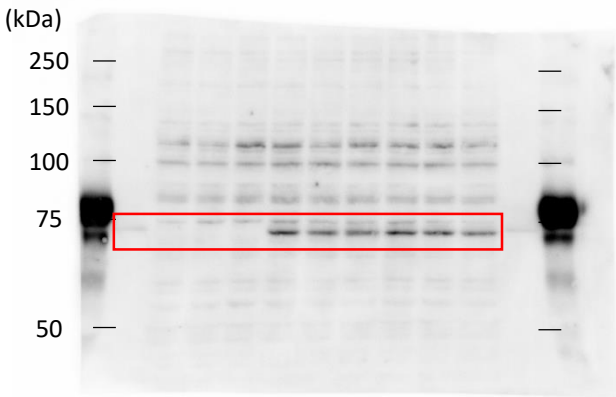

vinculin

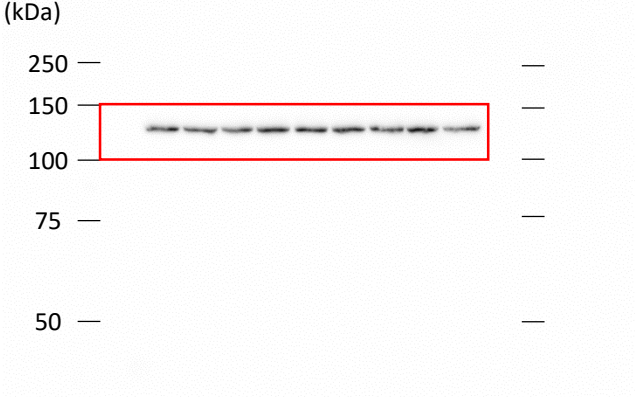

Supplement: 41598_2019_39973_MOESM1_ESM.pdf [file 41598_2019_39973_MOESM1_ESM.pdf]
